# Supplementary material for: Evaporation from cultivated and semi-wild Sudanian Savanna in west Africa
Source: Copernicus journal article supplement (doi:10.5194/hess-21-4149-2017), 2017-08-22
Supplement: Supplementary file 2 [file hess-21-4149-2017-supplement.zip]

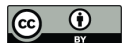

*Supplement of*

## **Evaporation from cultivated and semi-wild Sudanian Savanna in west Africa**

**Natalie C. Ceperley et al.**

*Correspondence to:* Natalie C. Ceperley ([natalie.ceperley@unil.ch](mailto:natalie.ceperley@unil.ch))

- [hess-21-4149-2017-supplement-title-page.pdf](#)
- [figS1.eps](#)
- [figS2.eps](#)
- [figS3.eps](#)
- [hess-2016-672-supplement-version1.pdf](#)

The copyright of individual parts of the supplement might differ from the CC BY 3.0 License.
